# Supplementary material for: High-voltage deprotonation of layered-type materials as a newly identified cause of electrode degradation
Source: Royal Society of Chemistry journal article supplement (doi:10.1039/d2ta07496f), 2023-01-01
Supplement: d2ta07496f1.pdf [file d2ta07496f1.pdf]

## Supporting Information

### **High-Voltage Deprotonation of Layered-Type Materials as Newly Identified Cause of Electrode Degradation**

Junghoon Yang,<sup>\*,a,b</sup> Sungwon Park,<sup>c</sup> Sungsik Lee,<sup>d</sup> Jungpil Kim,<sup>b</sup> Di Huang,<sup>a</sup> Jihyeon Gim,<sup>c</sup> Eungje Lee,<sup>c</sup> Gilseob Kim,<sup>f</sup> Kyusung Park,<sup>a</sup> Yong-Mook Kang,<sup>\*,f,g</sup> Eunsu Paek<sup>\*,c</sup> and Sang-Don Han<sup>\*,a</sup>

<sup>a</sup> Materials, Chemical, and Computational Science Directorate, National Renewable Energy Laboratory, Golden, CO 80401, USA. E-mail: sang-don.han@nrel.gov.

<sup>b</sup> Carbon and Light Materials Application R&D Group, Korea Institute of Industrial Technology, Jeonju, 54853, Republic of Korea. E-mail: jyang@kitech.re.kr.

<sup>c</sup> Department of Chemical & Biomolecular Engineering, Clarkson University, Potsdam, NY 13699, USA. E-mail: epaek@clarkson.edu.

<sup>d</sup> X-ray Science Division, Argonne National Laboratory, Lemont, IL 60439, USA.

<sup>e</sup> Chemical Sciences and Engineering Division, Argonne National Laboratory, Lemont, IL 60439, USA.

<sup>f</sup> Department of Materials Science and Engineering, Korea University, Seoul, 02841, Republic of Korea. E-mail: dake1234@korea.ac.kr.

<sup>g</sup> KU-KIST Graduate School of Converging Science and Technology, Korea University Seoul, 02841, Republic of Korea. E-mail: dake1234@korea.ac.kr.

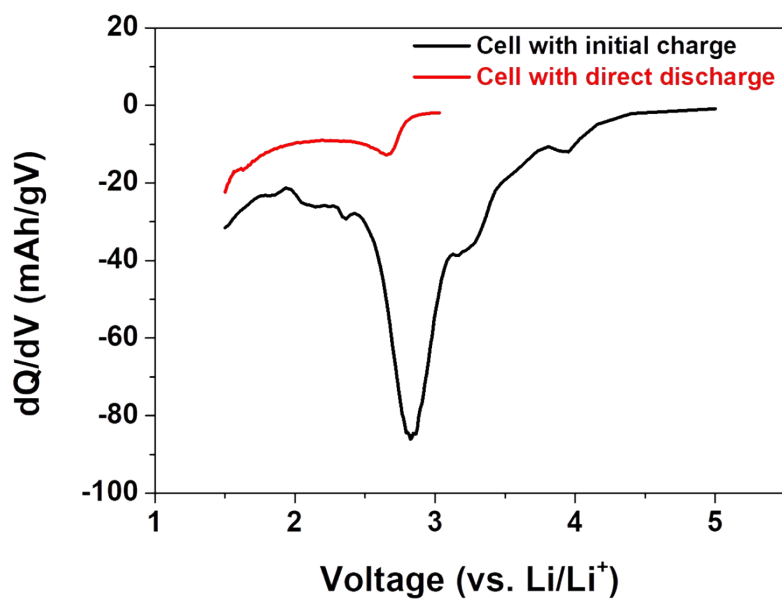

**Figure S1.**  $dQ/dV$  plots of NM-hydroxide obtained from the 1<sup>st</sup> discharge voltage profile with and without the prior 1<sup>st</sup> charging process.

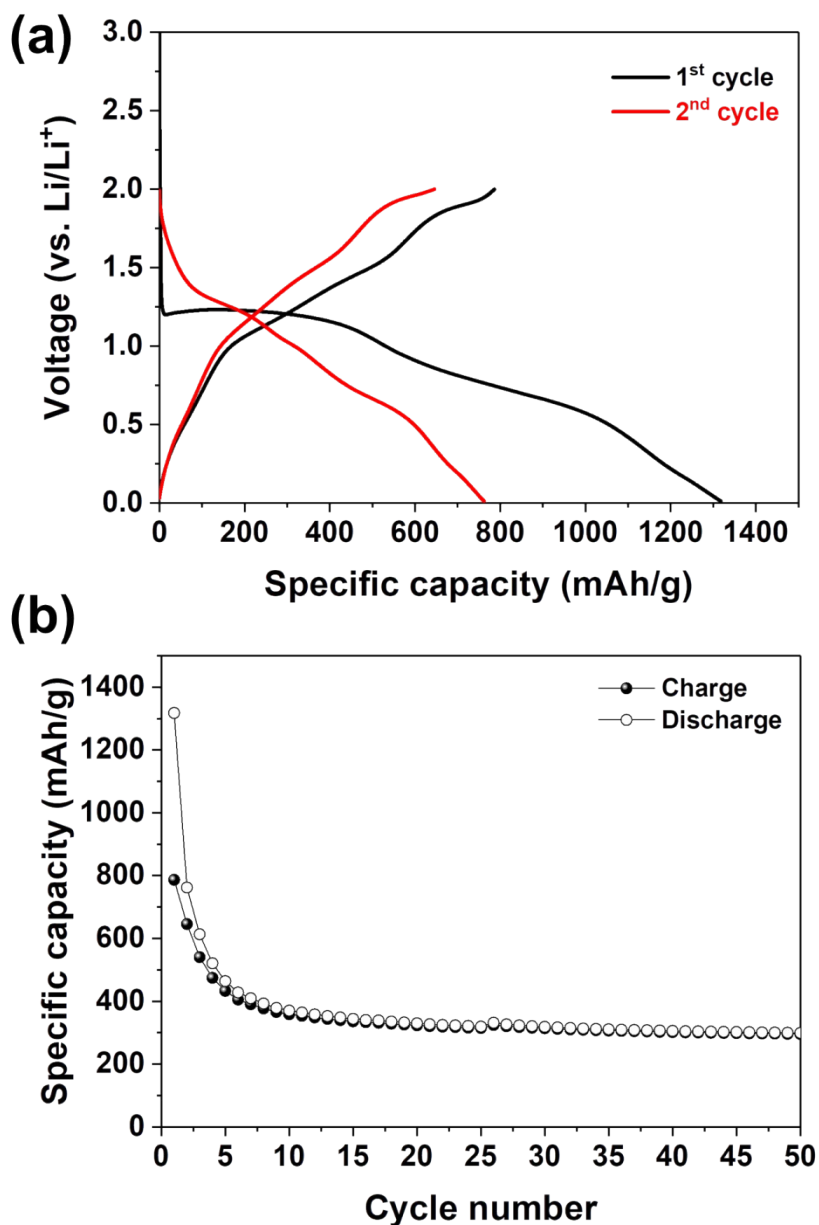

**Figure S2.** Electrochemical performance of NM-hydroxide electrodes as anode materials: (a) voltage vs. specific capacity profile and (b) cycling stability at current density of 20 mA $g^{-1}$  in the voltage range of 0.01-2.0 V.

Figure S2 shows the electrochemical behaviors of NM-hydroxide as an anode material by discharging first from OCV to 0.01 V (vs. Li/Li<sup>+</sup>, hereafter). The plateau observed at ~1.25 V during the 1<sup>st</sup> discharging is a typical electrochemical signal originated from the conversion reaction of layered hydroxide materials indicating NM-hydroxide can store lithium ions in its structure. In this regard, the gradual increase in discharge capacities of NM-hydroxide based on charging first and then discharging protocol (Figure 2b) demonstrates that during the 1<sup>st</sup> charging additional reaction may be occurred (in addition to side reactions including electrolyte decomposition and CEI formation) that possibly forms an interstitial site in NM-hydroxide where more lithium ions can be stored.

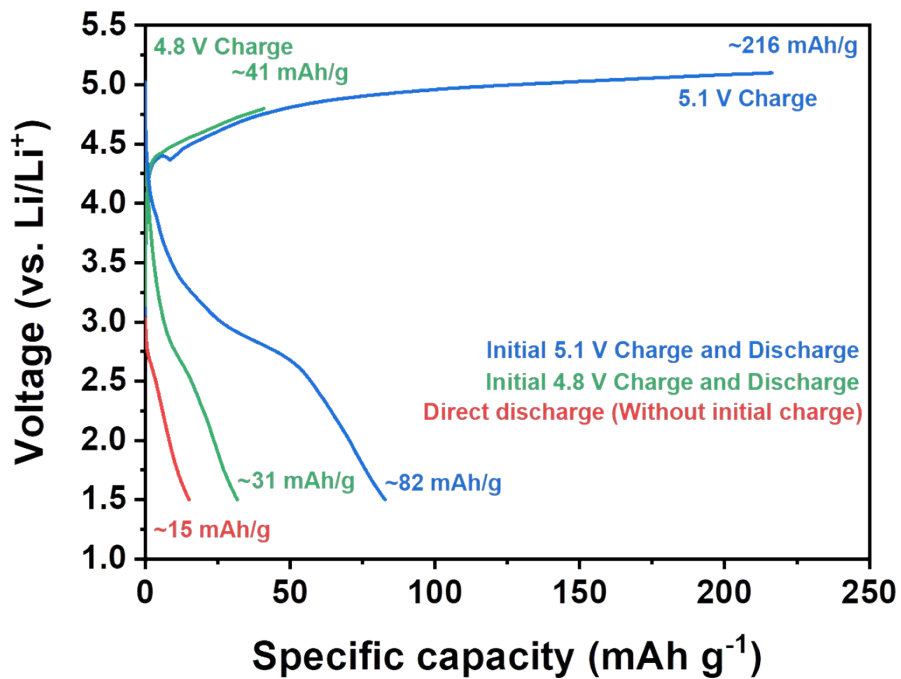

**Figure S3.** Specific capacity vs. voltage profiles of NM-hydroxide for the first cycle based on different electrochemical protocols.

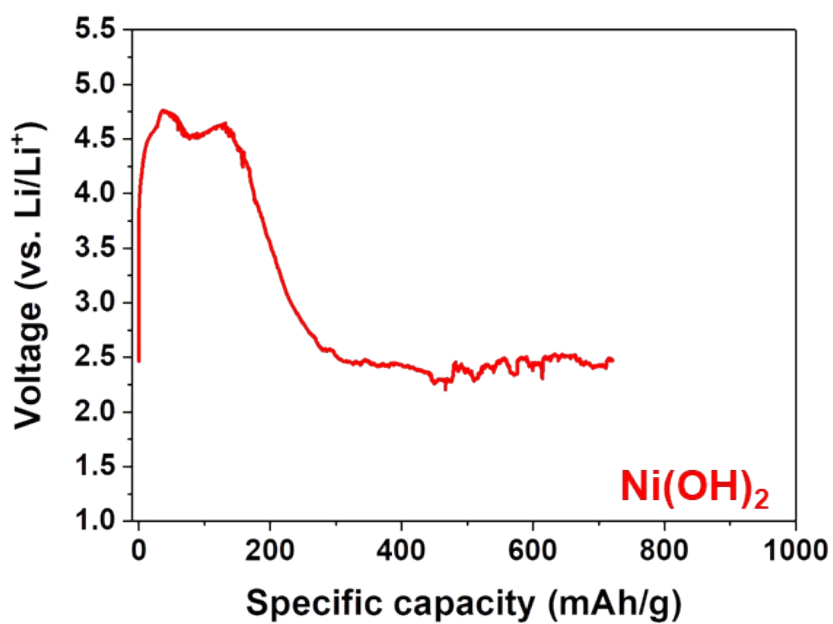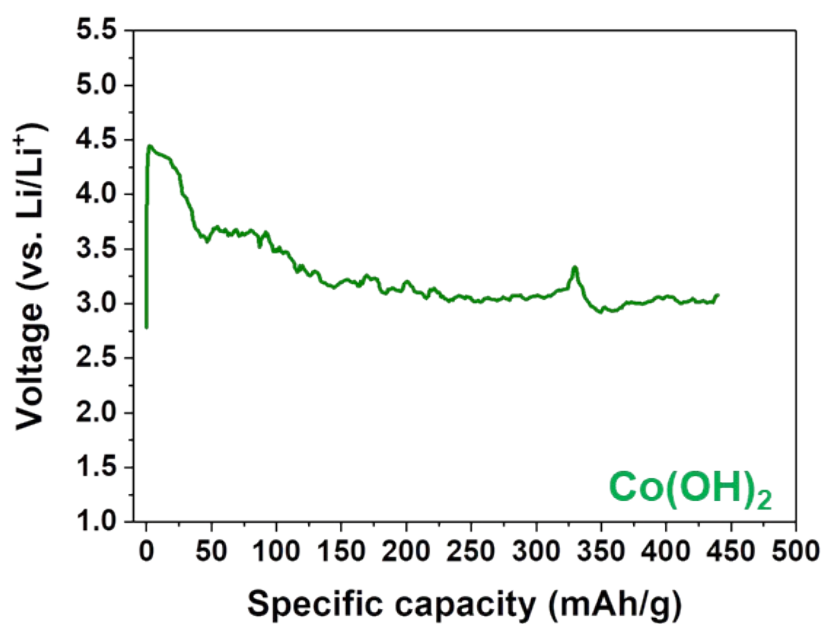

**Figure S4.** Initial charge profiles of Ni(OH)<sub>2</sub> and Co(OH)<sub>2</sub> analyzed in the voltage window of 1.5-5.1V (vs. Li/Li<sup>+</sup>) at current density of 10 mA/g.

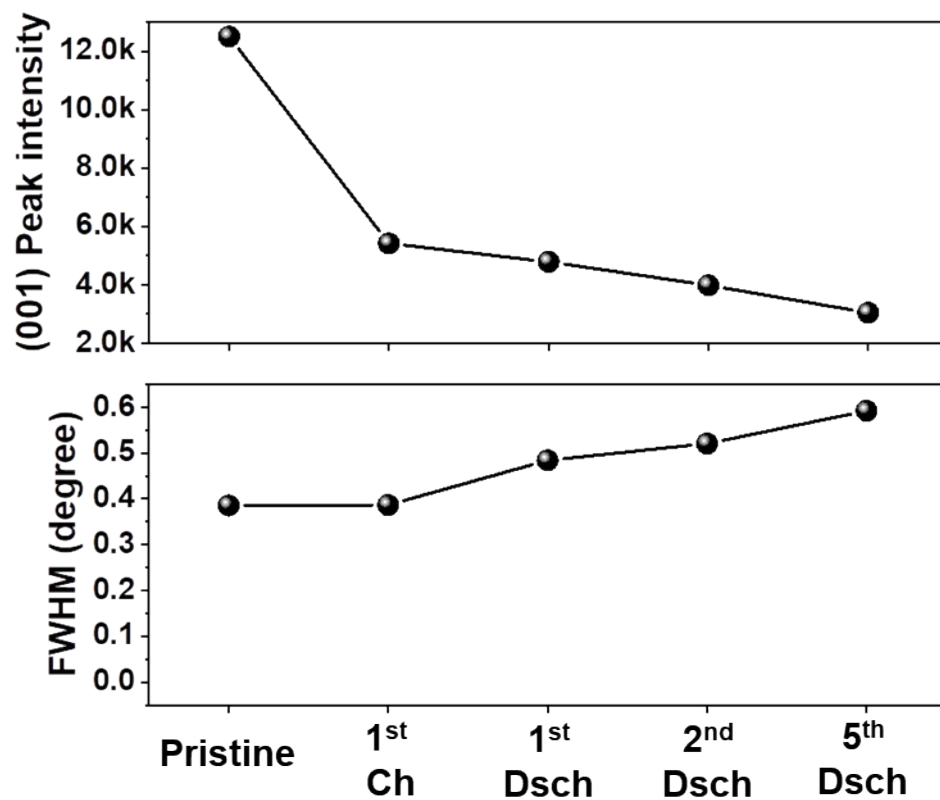

**Figure S5.** Changes of full width at half maximum (FWHM) and intensity changes of (001) peak obtained from *ex situ* XRD patterns of NM-hydroxide.

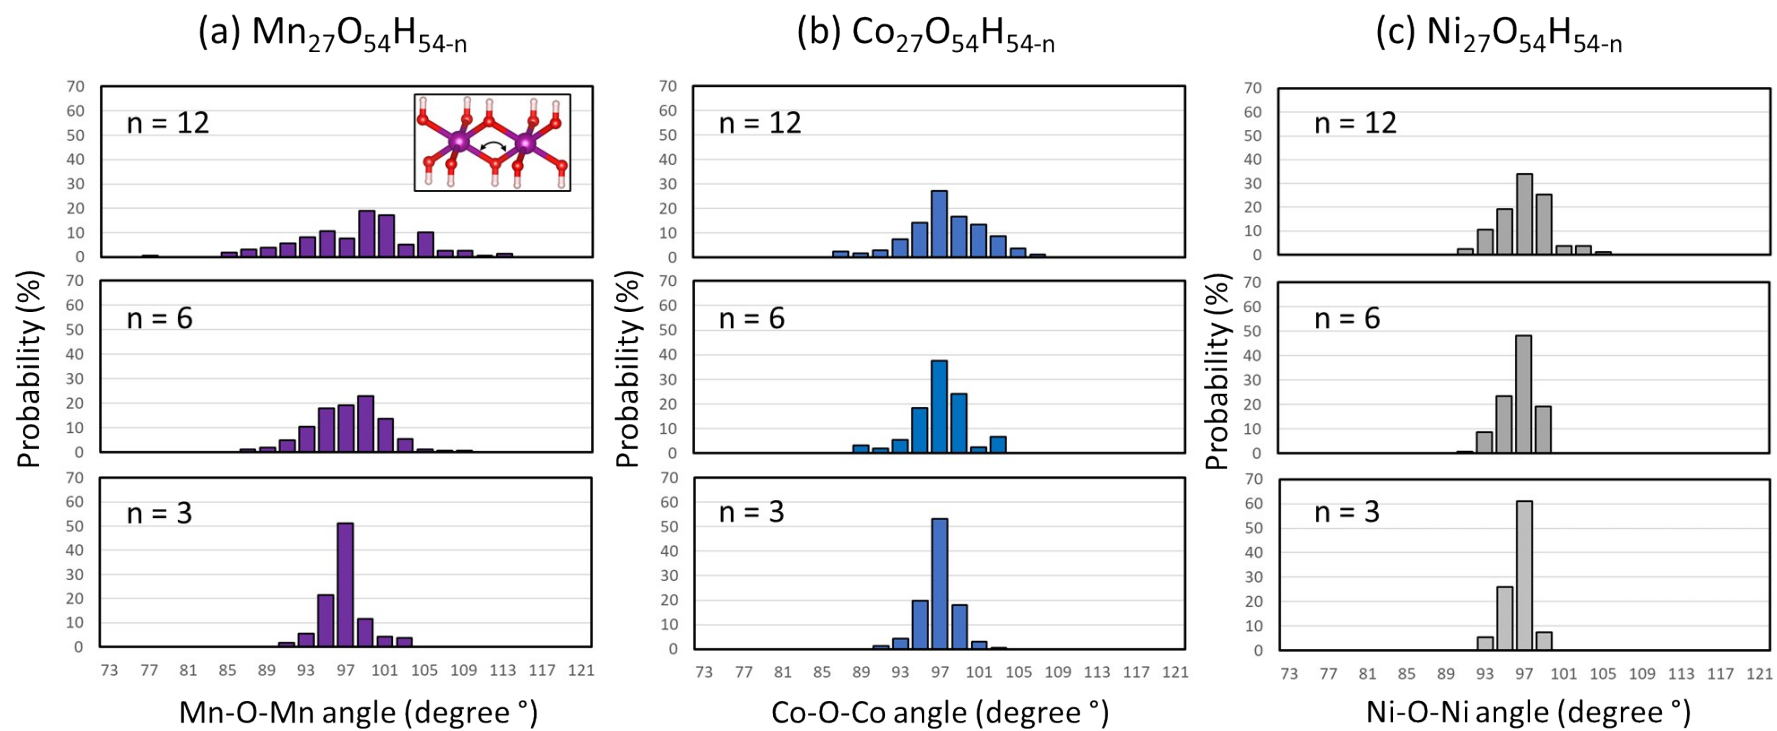

**Figure S6.** The distributions of (TM-O-TM) angles for (a)  $\text{Mn}_{27}\text{O}_{54}\text{H}_{54-n}$ , (b)  $\text{Co}_{27}\text{O}_{54}\text{H}_{54-n}$  and (c)  $\text{Ni}_{27}\text{O}_{54}\text{H}_{54-n}$  with various dehydrogenation levels ( $n = 3, 6$  and  $12$ ).

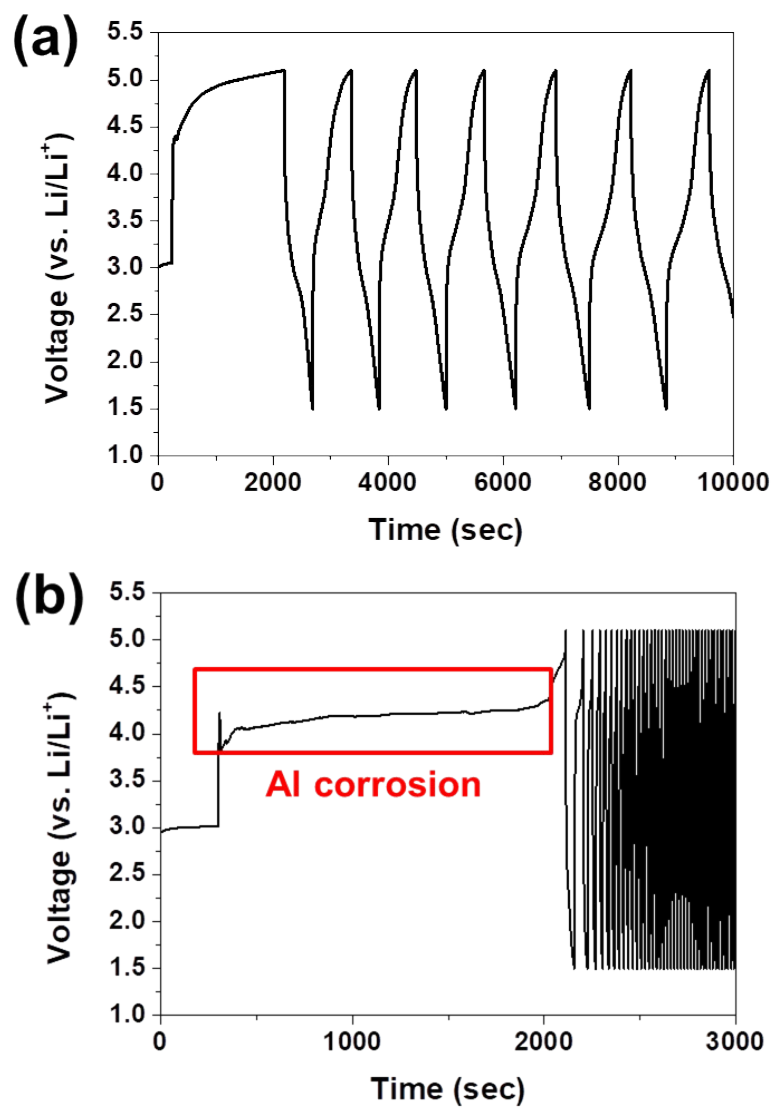

**Figure S7.** Time vs. voltage profiles of NM-hydroxide in (a) Gen2 and (b) LiTFSI-EC/EMC electrolytes.



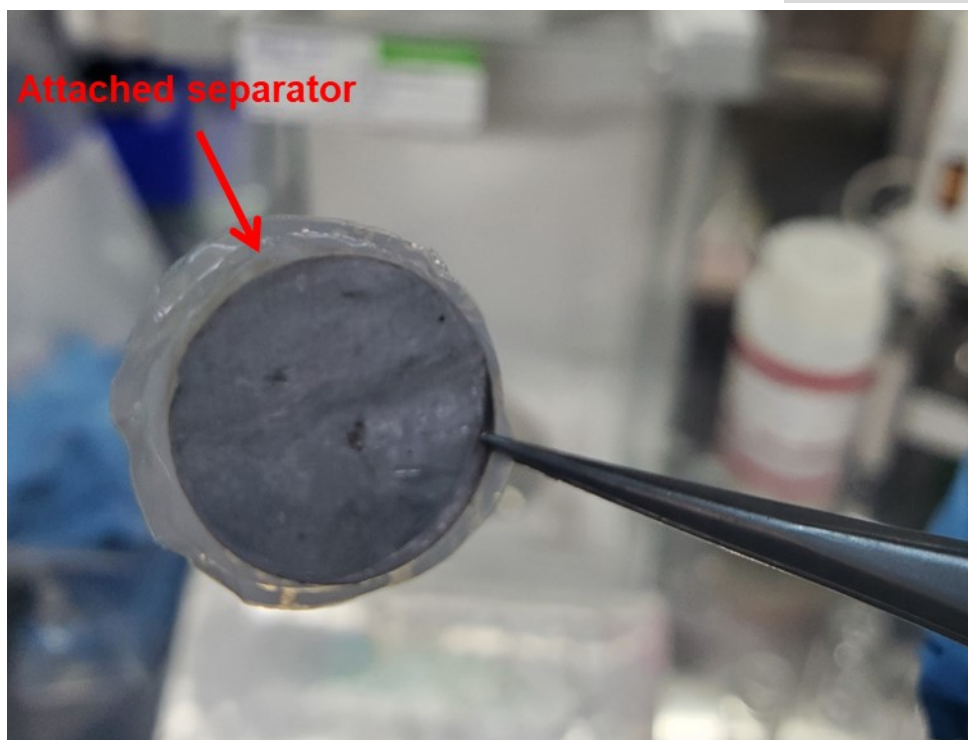

**Figure S8.** Photo image of the attached separator on the cycled Li metal anode in the Gen2 electrolyte.

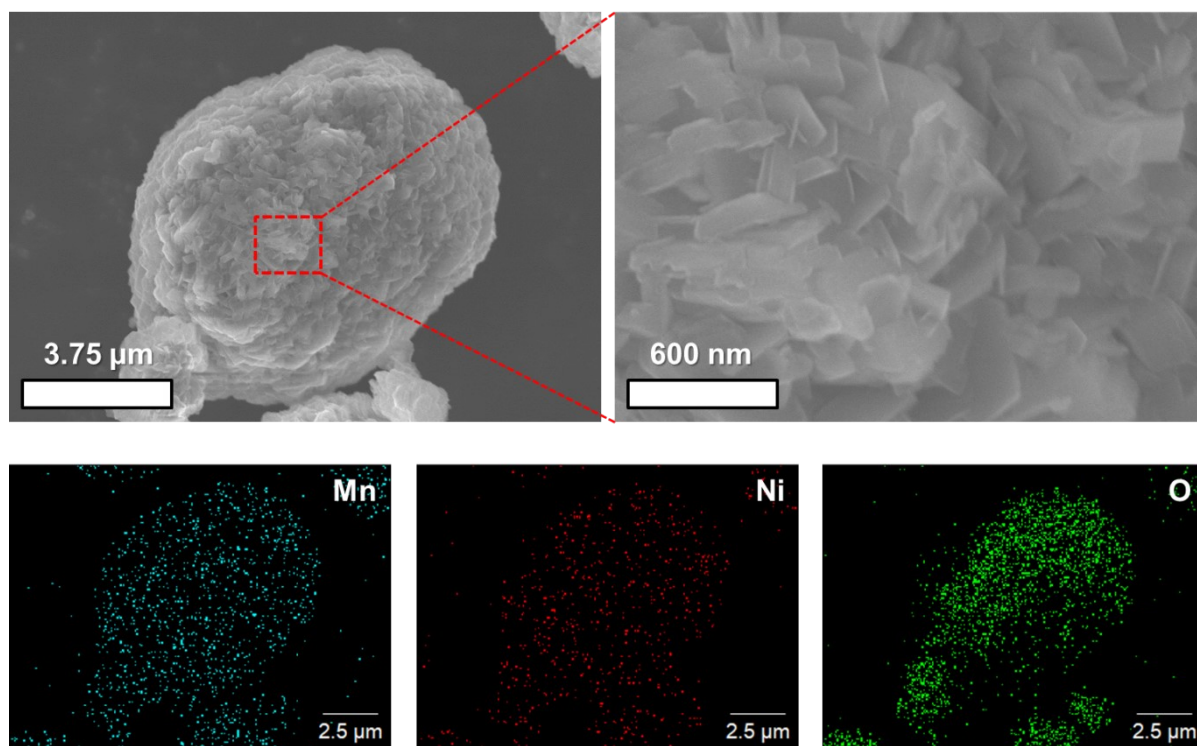

**Figure S9.** SEM image of a NM-hydroxide particle and corresponding EDS elemental mapping for Mn, Ni and O.

(a) Top view

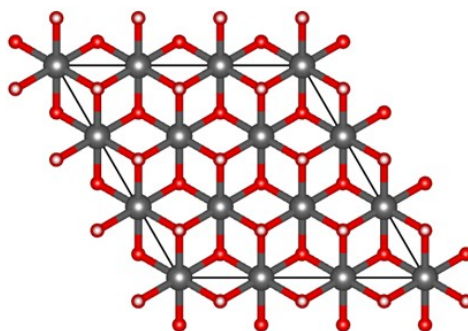

(b) Side view

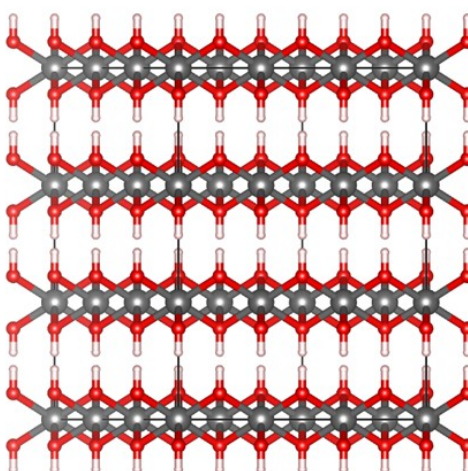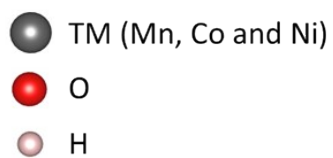

**Figure S10.** (a) top and (b) side view of the  $3 \times 3 \times 3$   $\text{TM}(\text{OH})_2$  supercell (TM = Mn, Co and Ni).
